# Supplementary material
Source: Springer Nature journal article supplement (https://www.springermedizin.de/resource/supplementary/13045_2013_387_MOESM1_ESM.pdf/9661260)
Supplement: MOESM1 [file 9661260]

**A**

pre-procedure  
August 1999

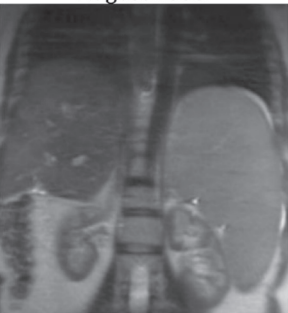

post-first procedure  
August 2000

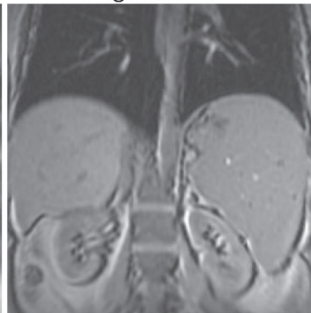

post-second procedure  
July 2001

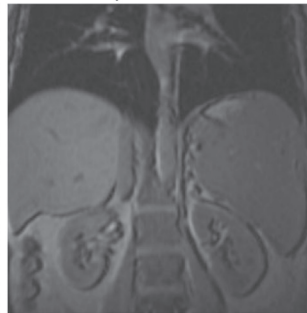

post-third procedure  
October 2003

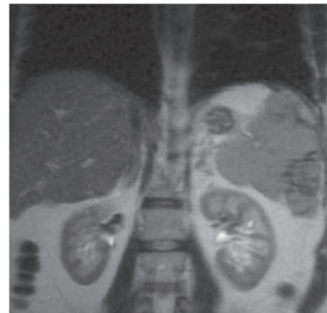**B**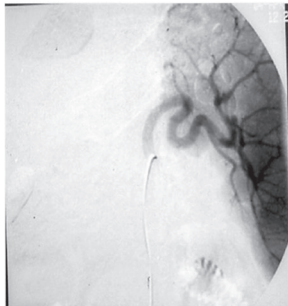

pre-Embolization

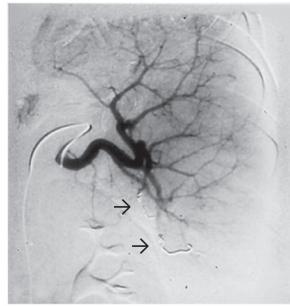

post-Embolization
